# Supplementary material for: Bi-cultural dynamics for risk and protective factors for cardiometabolic health in an Alaska Native (Yup’ik) population
Source: PubMed Central journal article supplement (PMC5665420; doi:10.1371/journal.pone.0183451), 2017-11-01
Supplement: pone.0183451.s001.pdf [file pone.0183451.s001.pdf]

**S1 Table. Complete direct and total path Coefficients for Inner Partial Least Squares Path Model, with Bootstrap Standard Error and 95% Confidence Intervals (n = 486).**

| Path                               | Direct Path    |       |        |         | Total Effect   |       |        |         |
|------------------------------------|----------------|-------|--------|---------|----------------|-------|--------|---------|
|                                    | Coefficient    | SE    | CI Low | CI High | Coefficient    | SE    | CI Low | CI High |
| Gender -> Education                | -0.005         | 0.043 | -0.083 | 0.082   | -0.005         | 0.043 | -0.083 | 0.082   |
| Gender -> Economic status          | 0.066          | 0.044 | -0.026 | 0.146   | 0.066          | 0.044 | -0.026 | 0.146   |
| Gender -> Western culture          | -0.010         | 0.044 | -0.096 | 0.070   | -0.010         | 0.044 | -0.096 | 0.070   |
| Gender -> Yup'ik culture           | 0.011          | 0.045 | -0.072 | 0.097   | 0.011          | 0.045 | -0.072 | 0.097   |
| Gender -> Subsistence food         | <b>0.168*</b>  | 0.033 | 0.106  | 0.236   | <b>0.175*</b>  | 0.035 | 0.109  | 0.245   |
| Gender -> Processed food           | -0.001         | 0.043 | -0.078 | 0.087   | -0.002         | 0.045 | -0.078 | 0.089   |
| Gender -> Fruits and vegetables    | 0.074          | 0.047 | -0.027 | 0.167   | 0.074          | 0.048 | -0.022 | 0.172   |
| Gender -> Physical activity        | <b>-0.203*</b> | 0.043 | -0.287 | -0.119  | <b>-0.202*</b> | 0.042 | -0.285 | -0.121  |
| Gender -> Smoke tobacco            | <b>-0.350*</b> | 0.039 | -0.422 | -0.273  | <b>-0.350*</b> | 0.039 | -0.422 | -0.274  |
| Gender -> Smokeless tobacco        | <b>0.144*</b>  | 0.045 | 0.057  | 0.236   | <b>0.137*</b>  | 0.046 | 0.048  | 0.227   |
| Gender -> Adiposity                | 0.097          | 0.049 | -0.001 | 0.192   | <b>0.134*</b>  | 0.044 | 0.052  | 0.220   |
| Gender -> TG-HDL Lipids            | <b>-0.293*</b> | 0.037 | -0.368 | -0.221  | <b>-0.245*</b> | 0.037 | -0.318 | -0.174  |
| Gender -> Glycemia                 | 0.013          | 0.049 | -0.094 | 0.105   | 0.038          | 0.045 | -0.058 | 0.119   |
| Gender -> Blood Pressure           | <b>-0.295*</b> | 0.047 | -0.380 | -0.203  | <b>-0.272*</b> | 0.044 | -0.357 | -0.182  |
| Gender -> LDL Lipids               | -0.052         | 0.042 | -0.135 | 0.028   | -0.003         | 0.040 | -0.081 | 0.073   |
| Age -> Education                   | -0.087         | 0.078 | -0.215 | 0.079   | -0.087         | 0.078 | -0.215 | 0.079   |
| Age -> Economic status             | <b>-0.162*</b> | 0.049 | -0.259 | -0.070  | <b>-0.169*</b> | 0.048 | -0.264 | -0.074  |
| Age -> Western culture             | <b>-0.216*</b> | 0.040 | -0.294 | -0.135  | <b>-0.216*</b> | 0.040 | -0.294 | -0.135  |
| Age -> Yup'ik culture              | <b>0.318*</b>  | 0.042 | 0.239  | 0.401   | <b>0.318*</b>  | 0.042 | 0.239  | 0.401   |
| Age -> Subsistence food            | <b>0.410*</b>  | 0.040 | 0.337  | 0.489   | <b>0.492*</b>  | 0.036 | 0.422  | 0.564   |
| Age -> Processed food              | <b>-0.469*</b> | 0.040 | -0.539 | -0.380  | <b>-0.513*</b> | 0.036 | -0.574 | -0.434  |
| Age -> Fruits and vegetables       | <b>-0.174*</b> | 0.048 | -0.266 | -0.081  | <b>-0.198*</b> | 0.045 | -0.285 | -0.112  |
| Age -> Physical activity           | <b>-0.301*</b> | 0.048 | -0.392 | -0.201  | <b>-0.320*</b> | 0.043 | -0.397 | -0.234  |
| Age -> Smoke tobacco               | <b>-0.167*</b> | 0.046 | -0.255 | -0.078  | <b>-0.185*</b> | 0.040 | -0.267 | -0.110  |
| Age -> Smokeless tobacco           | 0.049          | 0.051 | -0.052 | 0.142   | <b>0.116*</b>  | 0.047 | 0.015  | 0.199   |
| Age -> Adiposity                   | <b>0.224*</b>  | 0.057 | 0.113  | 0.339   | <b>0.202*</b>  | 0.043 | 0.121  | 0.288   |
| Age -> TG-HDL Lipids               | <b>-0.422*</b> | 0.050 | -0.513 | -0.317  | <b>-0.413*</b> | 0.037 | -0.475 | -0.333  |
| Age -> Glycemia                    | <b>0.431*</b>  | 0.073 | 0.306  | 0.547   | <b>0.469*</b>  | 0.058 | 0.375  | 0.539   |
| Age -> Blood Pressure              | <b>0.305*</b>  | 0.059 | 0.188  | 0.426   | <b>0.311*</b>  | 0.041 | 0.230  | 0.391   |
| Age -> LDL Lipids                  | <b>0.398*</b>  | 0.055 | 0.285  | 0.500   | <b>0.469*</b>  | 0.036 | 0.402  | 0.539   |
| Education -> Economic status       | 0.072          | 0.056 | -0.034 | 0.185   | 0.072          | 0.056 | -0.034 | 0.185   |
| Education -> Subsistence food      | 0.063          | 0.046 | -0.027 | 0.148   | 0.067          | 0.046 | -0.024 | 0.153   |
| Education -> Processed food        | <b>0.130*</b>  | 0.036 | 0.060  | 0.200   | <b>0.131*</b>  | 0.036 | 0.061  | 0.201   |
| Education -> Fruits and vegetables | 0.088          | 0.046 | -0.005 | 0.176   | 0.090          | 0.045 | -0.001 | 0.178   |
| Education -> Physical activity     | -0.018         | 0.038 | -0.093 | 0.054   | -0.016         | 0.038 | -0.090 | 0.057   |

| Path                                     | Direct Path    |       |        |         | Total Effect   |       |        |         |
|------------------------------------------|----------------|-------|--------|---------|----------------|-------|--------|---------|
|                                          | Coefficient    | SE    | CI Low | CI High | Coefficient    | SE    | CI Low | CI High |
| Education -> Smoke tobacco               | <b>-0.069*</b> | 0.036 | -0.140 | -0.001  | <b>-0.069*</b> | 0.036 | -0.138 | 0.000   |
| Education -> Smokeless tobacco           | -0.020         | 0.049 | -0.121 | 0.072   | -0.030         | 0.051 | -0.130 | 0.070   |
| Education -> Adiposity                   | 0.075          | 0.040 | -0.002 | 0.157   | <b>0.100*</b>  | 0.040 | 0.023  | 0.184   |
| Education -> TG-HDL Lipids               | 0.026          | 0.041 | -0.053 | 0.107   | 0.070          | 0.045 | -0.016 | 0.160   |
| Education -> Glycemia                    | -0.035         | 0.051 | -0.125 | 0.074   | -0.017         | 0.051 | -0.106 | 0.088   |
| Education -> Blood Pressure              | -0.074         | 0.045 | -0.164 | 0.013   | -0.055         | 0.045 | -0.146 | 0.035   |
| Education -> LDL Lipids                  | 0.096          | 0.049 | -0.002 | 0.189   | <b>0.124*</b>  | 0.049 | 0.025  | 0.215   |
| Economic status -> Subsistence food      | 0.052          | 0.038 | -0.024 | 0.127   | 0.052          | 0.038 | -0.024 | 0.127   |
| Economic status -> Processed food        | 0.007          | 0.040 | -0.068 | 0.089   | 0.007          | 0.040 | -0.068 | 0.089   |
| Economic status -> Fruits and vegetables | 0.028          | 0.044 | -0.061 | 0.116   | 0.028          | 0.044 | -0.061 | 0.116   |
| Economic status -> Physical activity     | 0.027          | 0.049 | -0.067 | 0.122   | 0.027          | 0.049 | -0.067 | 0.122   |
| Economic status -> Smoke tobacco         | 0.003          | 0.042 | -0.074 | 0.086   | 0.003          | 0.042 | -0.074 | 0.086   |
| Economic status -> Smokeless tobacco     | <b>-0.136*</b> | 0.047 | -0.225 | -0.045  | <b>-0.136*</b> | 0.047 | -0.225 | -0.045  |
| Economic status -> Adiposity             | -0.031         | 0.050 | -0.127 | 0.068   | -0.015         | 0.050 | -0.111 | 0.084   |
| Economic status -> TG-HDL Lipids         | 0.022          | 0.037 | -0.057 | 0.093   | 0.015          | 0.043 | -0.072 | 0.097   |
| Economic status -> Glycemia              | 0.058          | 0.043 | -0.033 | 0.136   | 0.058          | 0.045 | -0.034 | 0.140   |
| Economic status -> Blood Pressure        | -0.052         | 0.042 | -0.129 | 0.028   | -0.056         | 0.044 | -0.135 | 0.027   |
| Economic status -> LDL Lipids            | -0.015         | 0.045 | -0.100 | 0.074   | -0.002         | 0.047 | -0.088 | 0.093   |
| Western culture -> Subsistence food      | <b>-0.175*</b> | 0.049 | -0.260 | -0.077  | <b>-0.175*</b> | 0.049 | -0.260 | -0.077  |
| Western culture -> Processed food        | <b>0.185*</b>  | 0.055 | 0.066  | 0.289   | <b>0.185*</b>  | 0.055 | 0.066  | 0.289   |
| Western culture -> Fruits and vegetables | 0.119          | 0.066 | -0.007 | 0.253   | 0.119          | 0.066 | -0.007 | 0.253   |
| Western culture -> Physical activity     | 0.090          | 0.064 | -0.039 | 0.216   | 0.090          | 0.064 | -0.039 | 0.216   |
| Western culture -> Smoke tobacco         | 0.052          | 0.071 | -0.084 | 0.191   | 0.052          | 0.071 | -0.084 | 0.191   |
| Western culture -> Smokeless tobacco     | 0.055          | 0.066 | -0.075 | 0.184   | 0.055          | 0.066 | -0.075 | 0.184   |
| Western culture -> Adiposity             | -0.072         | 0.068 | -0.201 | 0.058   | -0.084         | 0.067 | -0.212 | 0.050   |
| Western culture -> TG-HDL Lipids         | -0.006         | 0.054 | -0.107 | 0.104   | -0.025         | 0.056 | -0.132 | 0.088   |
| Western culture -> Glycemia              | -0.027         | 0.058 | -0.140 | 0.080   | -0.052         | 0.057 | -0.166 | 0.055   |
| Western culture -> Blood Pressure        | <b>-0.113*</b> | 0.060 | -0.231 | -0.004  | <b>-0.120*</b> | 0.062 | -0.241 | -0.001  |
| Western culture -> LDL Lipids            | -0.033         | 0.064 | -0.150 | 0.091   | -0.075         | 0.065 | -0.192 | 0.055   |
| Yup'ik culture -> Subsistence food       | <b>0.185*</b>  | 0.055 | 0.081  | 0.294   | <b>0.185*</b>  | 0.055 | 0.081  | 0.294   |
| Yup'ik culture -> Processed food         | 0.027          | 0.055 | -0.092 | 0.128   | 0.027          | 0.055 | -0.092 | 0.128   |
| Yup'ik culture -> Fruits and vegetables  | 0.044          | 0.074 | -0.098 | 0.188   | 0.044          | 0.074 | -0.098 | 0.188   |
| Yup'ik culture -> Physical activity      | 0.010          | 0.065 | -0.124 | 0.120   | 0.010          | 0.065 | -0.124 | 0.120   |
| Yup'ik culture -> Smoke tobacco          | -0.039         | 0.073 | -0.188 | 0.106   | -0.039         | 0.073 | -0.188 | 0.106   |
| Yup'ik culture -> Smokeless tobacco      | <b>0.170*</b>  | 0.077 | 0.030  | 0.322   | <b>0.170*</b>  | 0.077 | 0.030  | 0.322   |
| Yup'ik culture -> Adiposity              | <b>-0.189*</b> | 0.079 | -0.333 | -0.023  | <b>-0.188*</b> | 0.079 | -0.335 | -0.026  |
| Yup'ik culture -> TG-HDL Lipids          | -0.057         | 0.050 | -0.156 | 0.038   | <b>-0.145*</b> | 0.057 | -0.256 | -0.036  |
| Yup'ik culture -> Glycemia               | -0.029         | 0.060 | -0.155 | 0.077   | -0.061         | 0.060 | -0.188 | 0.044   |
| Yup'ik culture -> Blood Pressure         | <b>-0.153*</b> | 0.062 | -0.275 | -0.026  | <b>-0.205*</b> | 0.066 | -0.332 | -0.075  |

| Path                                    | Direct Path    |       |        |         | Total Effect   |       |        |         |
|-----------------------------------------|----------------|-------|--------|---------|----------------|-------|--------|---------|
|                                         | Coefficient    | SE    | CI Low | CI High | Coefficient    | SE    | CI Low | CI High |
| Yup'ik culture -> LDL Lipids            | -0.096         | 0.071 | -0.236 | 0.047   | -0.105         | 0.073 | -0.243 | 0.036   |
| Subsistence food -> Adiposity           | 0.078          | 0.055 | -0.023 | 0.185   | 0.078          | 0.055 | -0.023 | 0.185   |
| Subsistence food -> TG-HDL Lipids       | -0.060         | 0.049 | -0.160 | 0.031   | -0.030         | 0.053 | -0.136 | 0.074   |
| Subsistence food -> Glycemia            | 0.017          | 0.062 | -0.102 | 0.141   | 0.030          | 0.064 | -0.090 | 0.161   |
| Subsistence food -> Blood Pressure      | -0.054         | 0.055 | -0.162 | 0.049   | -0.035         | 0.056 | -0.151 | 0.068   |
| Subsistence food -> LDL Lipids          | <b>0.147*</b>  | 0.053 | 0.046  | 0.248   | <b>0.159*</b>  | 0.053 | 0.056  | 0.259   |
| Processed food -> Adiposity             | 0.081          | 0.066 | -0.037 | 0.222   | 0.081          | 0.066 | -0.037 | 0.222   |
| Processed food -> TG-HDL Lipids         | 0.062          | 0.049 | -0.023 | 0.158   | 0.094          | 0.058 | -0.004 | 0.215   |
| Processed food -> Glycemia              | -0.017         | 0.055 | -0.124 | 0.083   | -0.003         | 0.054 | -0.113 | 0.099   |
| Processed food -> Blood Pressure        | -0.015         | 0.058 | -0.120 | 0.109   | 0.004          | 0.060 | -0.099 | 0.131   |
| Processed food -> LDL Lipids            | -0.011         | 0.055 | -0.124 | 0.089   | 0.002          | 0.054 | -0.108 | 0.102   |
| Fruits and vegetables -> Adiposity      | 0.046          | 0.057 | -0.068 | 0.158   | 0.046          | 0.057 | -0.068 | 0.158   |
| Fruits and vegetables -> TG-HDL Lipids  | -0.034         | 0.043 | -0.121 | 0.048   | -0.016         | 0.048 | -0.114 | 0.076   |
| Fruits and vegetables -> Glycemia       | -0.054         | 0.050 | -0.155 | 0.045   | -0.046         | 0.050 | -0.142 | 0.058   |
| Fruits and vegetables -> Blood Pressure | 0.039          | 0.045 | -0.051 | 0.130   | 0.049          | 0.049 | -0.047 | 0.148   |
| Fruits and vegetables -> LDL Lipids     | 0.002          | 0.046 | -0.086 | 0.090   | 0.009          | 0.046 | -0.076 | 0.099   |
| Physical activity -> Adiposity          | <b>-0.133*</b> | 0.041 | -0.211 | -0.050  | <b>-0.133*</b> | 0.041 | -0.211 | -0.050  |
| Physical activity -> TG-HDL Lipids      | -0.024         | 0.039 | -0.107 | 0.049   | -0.077         | 0.043 | -0.168 | 0.002   |
| Physical activity -> Glycemia           | 0.056          | 0.047 | -0.038 | 0.144   | 0.033          | 0.046 | -0.058 | 0.119   |
| Physical activity -> Blood Pressure     | 0.028          | 0.044 | -0.059 | 0.112   | -0.003         | 0.045 | -0.090 | 0.085   |
| Physical activity -> LDL Lipids         | 0.041          | 0.041 | -0.039 | 0.124   | 0.020          | 0.040 | -0.061 | 0.095   |
| Smoke tobacco -> Adiposity              | -0.031         | 0.051 | -0.133 | 0.064   | -0.031         | 0.051 | -0.133 | 0.064   |
| Smoke tobacco -> TG-HDL Lipids          | -0.015         | 0.044 | -0.109 | 0.064   | -0.027         | 0.049 | -0.126 | 0.061   |
| Smoke tobacco -> Glycemia               | -0.038         | 0.046 | -0.119 | 0.064   | -0.043         | 0.046 | -0.124 | 0.059   |
| Smoke tobacco -> Blood Pressure         | -0.024         | 0.046 | -0.111 | 0.064   | -0.031         | 0.048 | -0.128 | 0.056   |
| Smoke tobacco -> LDL Lipids             | -0.056         | 0.047 | -0.149 | 0.032   | -0.061         | 0.046 | -0.155 | 0.026   |
| Smokeless tobacco -> Adiposity          | <b>-0.103*</b> | 0.044 | -0.187 | -0.018  | <b>-0.103*</b> | 0.044 | -0.187 | -0.018  |
| Smokeless tobacco -> TG-HDL Lipids      | -0.021         | 0.042 | -0.100 | 0.059   | -0.061         | 0.047 | -0.147 | 0.028   |
| Smokeless tobacco -> Glycemia           | -0.018         | 0.047 | -0.117 | 0.064   | -0.035         | 0.047 | -0.131 | 0.050   |
| Smokeless tobacco -> Blood Pressure     | -0.006         | 0.046 | -0.096 | 0.086   | -0.030         | 0.046 | -0.118 | 0.061   |
| Smokeless tobacco -> LDL Lipids         | -0.049         | 0.045 | -0.139 | 0.038   | -0.065         | 0.045 | -0.152 | 0.024   |
| Adiposity -> TG-HDL Lipids              | <b>0.393*</b>  | 0.036 | 0.323  | 0.465   | <b>0.393*</b>  | 0.036 | 0.323  | 0.465   |
| Adiposity -> Glycemia                   | <b>0.169*</b>  | 0.052 | 0.075  | 0.275   | <b>0.169*</b>  | 0.052 | 0.075  | 0.275   |
| Adiposity -> Blood Pressure             | <b>0.232*</b>  | 0.052 | 0.130  | 0.330   | <b>0.232*</b>  | 0.052 | 0.130  | 0.330   |
| Adiposity -> LDL Lipids                 | <b>0.159*</b>  | 0.051 | 0.066  | 0.268   | <b>0.159*</b>  | 0.051 | 0.066  | 0.268   |
| Gender -> Education                     | -0.005         | 0.043 | -0.083 | 0.082   | -0.005         | 0.043 | -0.083 | 0.082   |
| Gender -> Economic status               | 0.066          | 0.044 | -0.026 | 0.146   | 0.066          | 0.044 | -0.026 | 0.146   |
| Gender -> Western culture               | -0.010         | 0.044 | -0.096 | 0.070   | -0.010         | 0.044 | -0.096 | 0.070   |
| Gender -> Yup'ik culture                | 0.011          | 0.045 | -0.072 | 0.097   | 0.011          | 0.045 | -0.072 | 0.097   |

| Path                                | Direct Path    |       |        |         | Total Effect   |       |        |         |
|-------------------------------------|----------------|-------|--------|---------|----------------|-------|--------|---------|
|                                     | Coefficient    | SE    | CI Low | CI High | Coefficient    | SE    | CI Low | CI High |
| Gender -> Subsistence food          | <b>0.168*</b>  | 0.033 | 0.106  | 0.236   | <b>0.175*</b>  | 0.035 | 0.109  | 0.245   |
| Gender -> Processed food            | -0.001         | 0.043 | -0.078 | 0.087   | -0.002         | 0.045 | -0.078 | 0.089   |
| Gender -> Fruits and vegetables     | 0.074          | 0.047 | -0.027 | 0.167   | 0.074          | 0.048 | -0.022 | 0.172   |
| Gender -> Physical activity         | <b>-0.203*</b> | 0.043 | -0.287 | -0.119  | <b>-0.202*</b> | 0.042 | -0.285 | -0.121  |
| Gender -> Smoke tobacco             | <b>-0.350*</b> | 0.039 | -0.422 | -0.273  | <b>-0.350*</b> | 0.039 | -0.422 | -0.274  |
| Gender -> Smokeless tobacco         | <b>0.144*</b>  | 0.045 | 0.057  | 0.236   | <b>0.137*</b>  | 0.046 | 0.048  | 0.227   |
| Gender -> Adiposity                 | 0.097          | 0.049 | -0.001 | 0.192   | <b>0.134*</b>  | 0.044 | 0.052  | 0.220   |
| Gender -> TG-HDL Lipids             | <b>-0.293*</b> | 0.037 | -0.368 | -0.221  | <b>-0.245*</b> | 0.037 | -0.318 | -0.174  |
| Gender -> Glycemia                  | 0.013          | 0.049 | -0.094 | 0.105   | 0.038          | 0.045 | -0.058 | 0.119   |
| Gender -> Blood Pressure            | <b>-0.295*</b> | 0.047 | -0.380 | -0.203  | <b>-0.272*</b> | 0.044 | -0.357 | -0.182  |
| Gender -> LDL Lipids                | -0.052         | 0.042 | -0.135 | 0.028   | -0.003         | 0.040 | -0.081 | 0.073   |
| Age -> Education                    | -0.087         | 0.078 | -0.215 | 0.079   | -0.087         | 0.078 | -0.215 | 0.079   |
| Age -> Economic status              | <b>-0.162*</b> | 0.049 | -0.259 | -0.070  | <b>-0.169*</b> | 0.048 | -0.264 | -0.074  |
| Age -> Western culture              | <b>-0.216*</b> | 0.040 | -0.294 | -0.135  | <b>-0.216*</b> | 0.040 | -0.294 | -0.135  |
| Age -> Yup'ik culture               | <b>0.318*</b>  | 0.042 | 0.239  | 0.401   | <b>0.318*</b>  | 0.042 | 0.239  | 0.401   |
| Age -> Subsistence food             | <b>0.410*</b>  | 0.040 | 0.337  | 0.489   | <b>0.492*</b>  | 0.036 | 0.422  | 0.564   |
| Age -> Processed food               | <b>-0.469*</b> | 0.040 | -0.539 | -0.380  | <b>-0.513*</b> | 0.036 | -0.574 | -0.434  |
| Age -> Fruits and vegetables        | <b>-0.174*</b> | 0.048 | -0.266 | -0.081  | <b>-0.198*</b> | 0.045 | -0.285 | -0.112  |
| Age -> Physical activity            | <b>-0.301*</b> | 0.048 | -0.392 | -0.201  | <b>-0.320*</b> | 0.043 | -0.397 | -0.234  |
| Age -> Smoke tobacco                | <b>-0.167*</b> | 0.046 | -0.255 | -0.078  | <b>-0.185*</b> | 0.040 | -0.267 | -0.110  |
| Age -> Smokeless tobacco            | 0.049          | 0.051 | -0.052 | 0.142   | <b>0.116*</b>  | 0.047 | 0.015  | 0.199   |
| Age -> Adiposity                    | <b>0.224*</b>  | 0.057 | 0.113  | 0.339   | <b>0.202*</b>  | 0.043 | 0.121  | 0.288   |
| Age -> TG-HDL Lipids                | <b>-0.422*</b> | 0.050 | -0.513 | -0.317  | <b>-0.413*</b> | 0.037 | -0.475 | -0.333  |
| Age -> Glycemia                     | <b>0.431*</b>  | 0.073 | 0.306  | 0.547   | <b>0.469*</b>  | 0.058 | 0.375  | 0.539   |
| Age -> Blood Pressure               | <b>0.305*</b>  | 0.059 | 0.188  | 0.426   | <b>0.311*</b>  | 0.041 | 0.230  | 0.391   |
| Age -> LDL Lipids                   | <b>0.398*</b>  | 0.055 | 0.285  | 0.500   | <b>0.469*</b>  | 0.036 | 0.402  | 0.539   |
| Education -> Economic status        | 0.072          | 0.056 | -0.034 | 0.185   | 0.072          | 0.056 | -0.034 | 0.185   |
| Education -> Subsistence food       | 0.063          | 0.046 | -0.027 | 0.148   | 0.067          | 0.046 | -0.024 | 0.153   |
| Education -> Processed food         | <b>0.130*</b>  | 0.036 | 0.060  | 0.200   | <b>0.131*</b>  | 0.036 | 0.061  | 0.201   |
| Education -> Fruits and vegetables  | 0.088          | 0.046 | -0.005 | 0.176   | 0.090          | 0.045 | -0.001 | 0.178   |
| Education -> Physical activity      | -0.018         | 0.038 | -0.093 | 0.054   | -0.016         | 0.038 | -0.090 | 0.057   |
| Education -> Smoke tobacco          | <b>-0.069*</b> | 0.036 | -0.140 | -0.001  | <b>-0.069*</b> | 0.036 | -0.138 | 0.000   |
| Education -> Smokeless tobacco      | -0.020         | 0.049 | -0.121 | 0.072   | -0.030         | 0.051 | -0.130 | 0.070   |
| Education -> Adiposity              | 0.075          | 0.040 | -0.002 | 0.157   | <b>0.100*</b>  | 0.040 | 0.023  | 0.184   |
| Education -> TG-HDL Lipids          | 0.026          | 0.041 | -0.053 | 0.107   | 0.070          | 0.045 | -0.016 | 0.160   |
| Education -> Glycemia               | -0.035         | 0.051 | -0.125 | 0.074   | -0.017         | 0.051 | -0.106 | 0.088   |
| Education -> Blood Pressure         | -0.074         | 0.045 | -0.164 | 0.013   | -0.055         | 0.045 | -0.146 | 0.035   |
| Education -> LDL Lipids             | 0.096          | 0.049 | -0.002 | 0.189   | <b>0.124*</b>  | 0.049 | 0.025  | 0.215   |
| Economic status -> Subsistence food | 0.052          | 0.038 | -0.024 | 0.127   | 0.052          | 0.038 | -0.024 | 0.127   |

| Path                                     | Direct Path    |       |        |         | Total Effect   |       |        |         |
|------------------------------------------|----------------|-------|--------|---------|----------------|-------|--------|---------|
|                                          | Coefficient    | SE    | CI Low | CI High | Coefficient    | SE    | CI Low | CI High |
| Economic status -> Processed food        | 0.007          | 0.040 | -0.068 | 0.089   | 0.007          | 0.040 | -0.068 | 0.089   |
| Economic status -> Fruits and vegetables | 0.028          | 0.044 | -0.061 | 0.116   | 0.028          | 0.044 | -0.061 | 0.116   |
| Economic status -> Physical activity     | 0.027          | 0.049 | -0.067 | 0.122   | 0.027          | 0.049 | -0.067 | 0.122   |
| Economic status -> Smoke tobacco         | 0.003          | 0.042 | -0.074 | 0.086   | 0.003          | 0.042 | -0.074 | 0.086   |
| Economic status -> Smokeless tobacco     | <b>-0.136*</b> | 0.047 | -0.225 | -0.045  | <b>-0.136*</b> | 0.047 | -0.225 | -0.045  |
| Economic status -> Adiposity             | -0.031         | 0.050 | -0.127 | 0.068   | -0.015         | 0.050 | -0.111 | 0.084   |
| Economic status -> TG-HDL Lipids         | 0.022          | 0.037 | -0.057 | 0.093   | 0.015          | 0.043 | -0.072 | 0.097   |
| Economic status -> Glycemia              | 0.058          | 0.043 | -0.033 | 0.136   | 0.058          | 0.045 | -0.034 | 0.140   |
| Economic status -> Blood Pressure        | -0.052         | 0.042 | -0.129 | 0.028   | -0.056         | 0.044 | -0.135 | 0.027   |
| Economic status -> LDL Lipids            | -0.015         | 0.045 | -0.100 | 0.074   | -0.002         | 0.047 | -0.088 | 0.093   |
| Western culture -> Subsistence food      | <b>-0.175*</b> | 0.049 | -0.260 | -0.077  | <b>-0.175*</b> | 0.049 | -0.260 | -0.077  |
| Western culture -> Processed food        | <b>0.185*</b>  | 0.055 | 0.066  | 0.289   | <b>0.185*</b>  | 0.055 | 0.066  | 0.289   |
| Western culture -> Fruits and vegetables | 0.119          | 0.066 | -0.007 | 0.253   | 0.119          | 0.066 | -0.007 | 0.253   |
| Western culture -> Physical activity     | 0.090          | 0.064 | -0.039 | 0.216   | 0.090          | 0.064 | -0.039 | 0.216   |
| Western culture -> Smoke tobacco         | 0.052          | 0.071 | -0.084 | 0.191   | 0.052          | 0.071 | -0.084 | 0.191   |
| Western culture -> Smokeless tobacco     | 0.055          | 0.066 | -0.075 | 0.184   | 0.055          | 0.066 | -0.075 | 0.184   |
| Western culture -> Adiposity             | -0.072         | 0.068 | -0.201 | 0.058   | -0.084         | 0.067 | -0.212 | 0.050   |
| Western culture -> TG-HDL Lipids         | -0.006         | 0.054 | -0.107 | 0.104   | -0.025         | 0.056 | -0.132 | 0.088   |
| Western culture -> Glycemia              | -0.027         | 0.058 | -0.140 | 0.080   | -0.052         | 0.057 | -0.166 | 0.055   |
| Western culture -> Blood Pressure        | <b>-0.113*</b> | 0.060 | -0.231 | -0.004  | <b>-0.120*</b> | 0.062 | -0.241 | -0.001  |
| Western culture -> LDL Lipids            | -0.033         | 0.064 | -0.150 | 0.091   | -0.075         | 0.065 | -0.192 | 0.055   |
| Yup'ik culture -> Subsistence food       | <b>0.185*</b>  | 0.055 | 0.081  | 0.294   | <b>0.185*</b>  | 0.055 | 0.081  | 0.294   |
| Yup'ik culture -> Processed food         | 0.027          | 0.055 | -0.092 | 0.128   | 0.027          | 0.055 | -0.092 | 0.128   |
| Yup'ik culture -> Fruits and vegetables  | 0.044          | 0.074 | -0.098 | 0.188   | 0.044          | 0.074 | -0.098 | 0.188   |
| Yup'ik culture -> Physical activity      | 0.010          | 0.065 | -0.124 | 0.120   | 0.010          | 0.065 | -0.124 | 0.120   |
| Yup'ik culture -> Smoke tobacco          | -0.039         | 0.073 | -0.188 | 0.106   | -0.039         | 0.073 | -0.188 | 0.106   |
| Yup'ik culture -> Smokeless tobacco      | <b>0.170*</b>  | 0.077 | 0.030  | 0.322   | <b>0.170*</b>  | 0.077 | 0.030  | 0.322   |
| Yup'ik culture -> Adiposity              | <b>-0.189*</b> | 0.079 | -0.333 | -0.023  | <b>-0.188*</b> | 0.079 | -0.335 | -0.026  |
| Yup'ik culture -> TG-HDL Lipids          | -0.057         | 0.050 | -0.156 | 0.038   | <b>-0.145*</b> | 0.057 | -0.256 | -0.036  |
| Yup'ik culture -> Glycemia               | -0.029         | 0.060 | -0.155 | 0.077   | -0.061         | 0.060 | -0.188 | 0.044   |
| Yup'ik culture -> Blood Pressure         | <b>-0.153*</b> | 0.062 | -0.275 | -0.026  | <b>-0.205*</b> | 0.066 | -0.332 | -0.075  |
| Yup'ik culture -> LDL Lipids             | -0.096         | 0.071 | -0.236 | 0.047   | -0.105         | 0.073 | -0.243 | 0.036   |
| Subsistence food -> Adiposity            | 0.078          | 0.055 | -0.023 | 0.185   | 0.078          | 0.055 | -0.023 | 0.185   |
| Subsistence food -> TG-HDL Lipids        | -0.060         | 0.049 | -0.160 | 0.031   | -0.030         | 0.053 | -0.136 | 0.074   |
| Subsistence food -> Glycemia             | 0.017          | 0.062 | -0.102 | 0.141   | 0.030          | 0.064 | -0.090 | 0.161   |
| Subsistence food -> Blood Pressure       | -0.054         | 0.055 | -0.162 | 0.049   | -0.035         | 0.056 | -0.151 | 0.068   |
| Subsistence food -> LDL Lipids           | <b>0.147*</b>  | 0.053 | 0.046  | 0.248   | <b>0.159*</b>  | 0.053 | 0.056  | 0.259   |
| Processed food -> Adiposity              | 0.081          | 0.066 | -0.037 | 0.222   | 0.081          | 0.066 | -0.037 | 0.222   |
| Processed food -> TG-HDL Lipids          | 0.062          | 0.049 | -0.023 | 0.158   | 0.094          | 0.058 | -0.004 | 0.215   |

| Path                                    | Direct Path    |       |        |         | Total Effect   |       |        |         |
|-----------------------------------------|----------------|-------|--------|---------|----------------|-------|--------|---------|
|                                         | Coefficient    | SE    | CI Low | CI High | Coefficient    | SE    | CI Low | CI High |
| Processed food -> Glycemia              | -0.017         | 0.055 | -0.124 | 0.083   | -0.003         | 0.054 | -0.113 | 0.099   |
| Processed food -> Blood Pressure        | -0.015         | 0.058 | -0.120 | 0.109   | 0.004          | 0.060 | -0.099 | 0.131   |
| Processed food -> LDL Lipids            | -0.011         | 0.055 | -0.124 | 0.089   | 0.002          | 0.054 | -0.108 | 0.102   |
| Fruits and vegetables -> Adiposity      | 0.046          | 0.057 | -0.068 | 0.158   | 0.046          | 0.057 | -0.068 | 0.158   |
| Fruits and vegetables -> TG-HDL Lipids  | -0.034         | 0.043 | -0.121 | 0.048   | -0.016         | 0.048 | -0.114 | 0.076   |
| Fruits and vegetables -> Glycemia       | -0.054         | 0.050 | -0.155 | 0.045   | -0.046         | 0.050 | -0.142 | 0.058   |
| Fruits and vegetables -> Blood Pressure | 0.039          | 0.045 | -0.051 | 0.130   | 0.049          | 0.049 | -0.047 | 0.148   |
| Fruits and vegetables -> LDL Lipids     | 0.002          | 0.046 | -0.086 | 0.090   | 0.009          | 0.046 | -0.076 | 0.099   |
| Physical activity -> Adiposity          | <b>-0.133*</b> | 0.041 | -0.211 | -0.050  | <b>-0.133*</b> | 0.041 | -0.211 | -0.050  |
| Physical activity -> TG-HDL Lipids      | -0.024         | 0.039 | -0.107 | 0.049   | -0.077         | 0.043 | -0.168 | 0.002   |
| Physical activity -> Glycemia           | 0.056          | 0.047 | -0.038 | 0.144   | 0.033          | 0.046 | -0.058 | 0.119   |
| Physical activity -> Blood Pressure     | 0.028          | 0.044 | -0.059 | 0.112   | -0.003         | 0.045 | -0.090 | 0.085   |
| Physical activity -> LDL Lipids         | 0.041          | 0.041 | -0.039 | 0.124   | 0.020          | 0.040 | -0.061 | 0.095   |
| Smoke tobacco -> Adiposity              | -0.031         | 0.051 | -0.133 | 0.064   | -0.031         | 0.051 | -0.133 | 0.064   |
| Smoke tobacco -> TG-HDL Lipids          | -0.015         | 0.044 | -0.109 | 0.064   | -0.027         | 0.049 | -0.126 | 0.061   |
| Smoke tobacco -> Glycemia               | -0.038         | 0.046 | -0.119 | 0.064   | -0.043         | 0.046 | -0.124 | 0.059   |
| Smoke tobacco -> Blood Pressure         | -0.024         | 0.046 | -0.111 | 0.064   | -0.031         | 0.048 | -0.128 | 0.056   |
| Smoke tobacco -> LDL Lipids             | -0.056         | 0.047 | -0.149 | 0.032   | -0.061         | 0.046 | -0.155 | 0.026   |
| Smokeless tobacco -> Adiposity          | <b>-0.103*</b> | 0.044 | -0.187 | -0.018  | <b>-0.103*</b> | 0.044 | -0.187 | -0.018  |
| Smokeless tobacco -> TG-HDL Lipids      | -0.021         | 0.042 | -0.100 | 0.059   | -0.061         | 0.047 | -0.147 | 0.028   |
| Smokeless tobacco -> Glycemia           | -0.018         | 0.047 | -0.117 | 0.064   | -0.035         | 0.047 | -0.131 | 0.050   |
| Smokeless tobacco -> Blood Pressure     | -0.006         | 0.046 | -0.096 | 0.086   | -0.030         | 0.046 | -0.118 | 0.061   |
| Smokeless tobacco -> LDL Lipids         | -0.049         | 0.045 | -0.139 | 0.038   | -0.065         | 0.045 | -0.152 | 0.024   |
| Adiposity -> TG-HDL Lipids              | <b>0.393*</b>  | 0.036 | 0.323  | 0.465   | <b>0.393*</b>  | 0.036 | 0.323  | 0.465   |
| Adiposity -> Glycemia                   | <b>0.169*</b>  | 0.052 | 0.075  | 0.275   | <b>0.169*</b>  | 0.052 | 0.075  | 0.275   |
| Adiposity -> Blood Pressure             | <b>0.232*</b>  | 0.052 | 0.130  | 0.330   | <b>0.232*</b>  | 0.052 | 0.130  | 0.330   |
| Adiposity -> LDL Lipids                 | <b>0.159*</b>  | 0.051 | 0.066  | 0.268   | <b>0.159*</b>  | 0.051 | 0.066  | 0.268   |

\* Significant effects ( $\alpha=0.05$ )

Notes: Goodness of fit (GoF) for model is 0.35. Based on cutoff values for Cohen  $f^2$  of .02, .15, and .35, our  $f^2$  values indicate high effects sizes for TG-HDL Lipids = 0.68, Subsistence food = 0.63, Processed food = 0.45, LDL Lipids = 0.39, Glycemia = 0.35, medium for Blood Pressure = 0.32, Smoke tobacco = 0.21, Physical activity = 0.18, and small for Adiposity = 0.14, Yup'ik culture = 0.11, Smokeless tobacco = 0.08, Fruits and vegetables = 0.07, Western culture = 0.05, and Economic status = 0.04.
